# Supplementary material for: QTL Mapping of Yield-Related Traits in Tetraploid Wheat Based on Wheat55K SNP Array
Source: MDPI journal article supplement (doi:10.3390/plants13101285), 2024-05-07
Supplement: s1 [file s1]

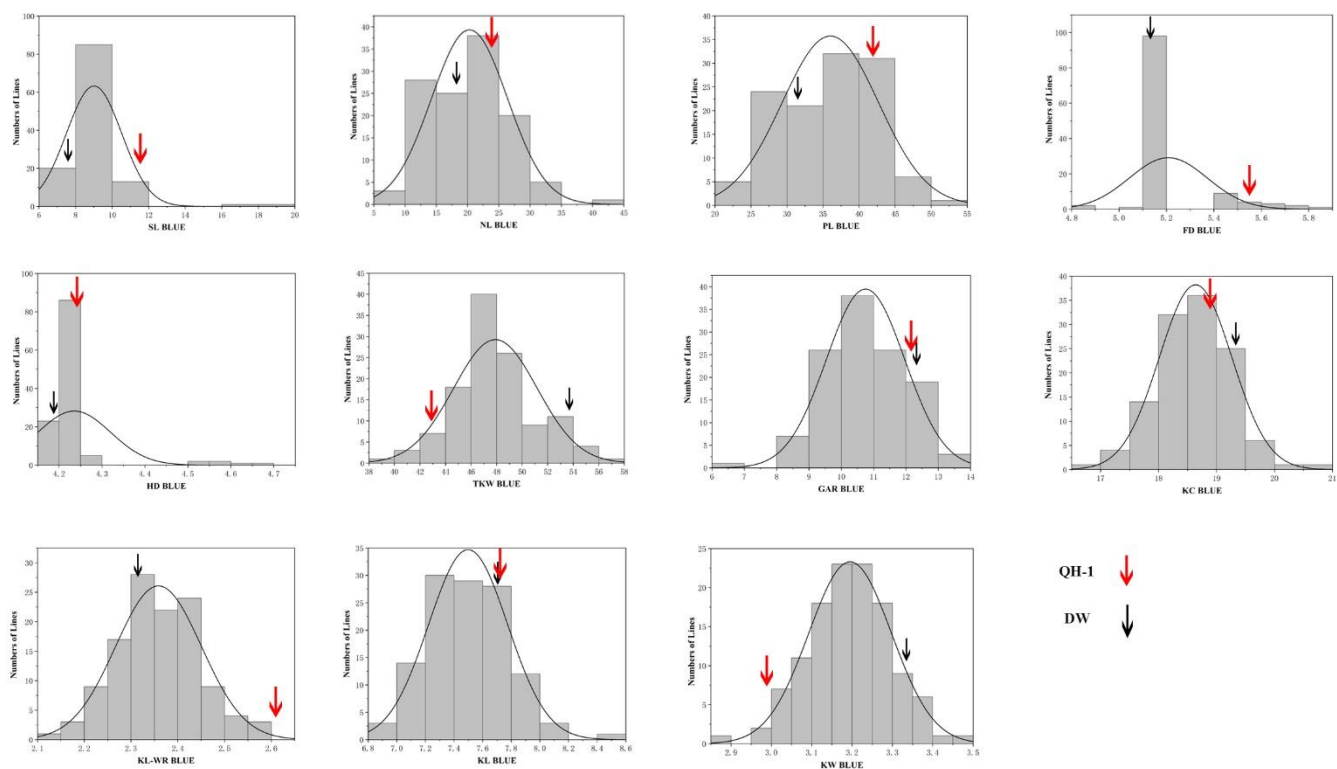

Figure Supplement S1. Frequency distributions for Spike length(SL), neck length(NL), peduncle length(PL), flowering date(FD), heading date(HD), thousand-kernel weight(TKW), Kernel area ratio(KAR), kernel circumference(KC), kernel length(KL), kernel width(KW) and kernel length-width ratio(KL-WR)based on BLUE.
