# Supplementary material for: QTL Mapping of Yield-Related Traits in Tetraploid Wheat Based on Wheat55K SNP Array
Source: MDPI journal article supplement (doi:10.3390/plants13101285), 2024-05-07
Supplement: s1 [file s1]

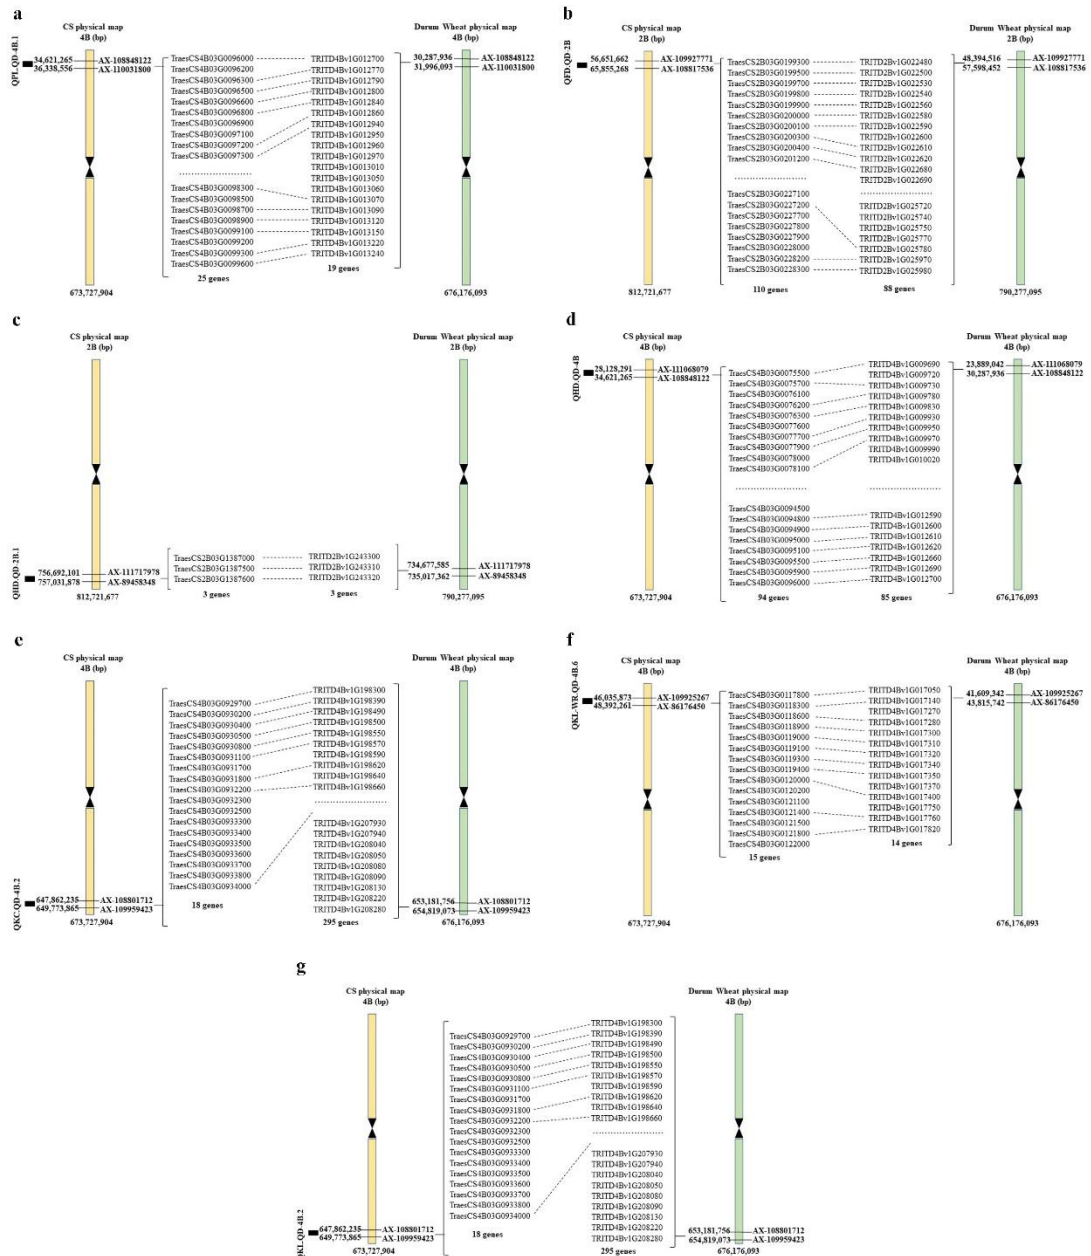

Figure Supplement S2. Physical maps of the *QPL.QD-4B.1*(a), *QFD.QD-2B*(b), *QHD.QD-2B.1*(c), *QHD.QD-4B*(d), *QKC.QD-4B.2*(e), *QKL-WR.QD-4B.6*(f), and *QKL.QD-4B.2*(g) on 'CS' and Durum Wheat; dotted lines indicate homologous genes
